# Supplementary material
Source: MDPI journal article supplement (https://www.mdpi.com/2673-4591/4/1/16)
Supplement: s1 [file s1]

# Lab-on-chip platform for on-field analysis of Grapevine leafroll-associated virus 3

Ilaria Buja<sup>1,2\*</sup>, Erika Sabella<sup>3</sup>, Anna Grazia Monteduro<sup>1,2</sup>, Maria Serena Chiriaco<sup>2</sup>, Rizzato Silvia<sup>1,2</sup>, Luigi De Bellis<sup>3</sup>, Andrea Luvisi<sup>3</sup> and Giuseppe Maruccio<sup>1,2</sup>

1 Department of Mathematics and Physics “Ennio De Giorgi”, University of Salento, Omnic Research Group, Via per Monteroni, 73100 Lecce, Italy;

2 Institute of Nanotechnology, CNR NANOTEC, Via per Monteroni, 73100 Lecce, Italy;

3 Department of Biological and Environmental Sciences and Technologies, University of Salento, via Monteroni, Lecce, 73100, Italy

\* Corresponding author: [Ilaria.buja@unisalento.it](mailto:Ilaria.buja@unisalento.it)

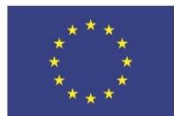

UNIONE EUROPEA  
Fondo Sociale Europeo

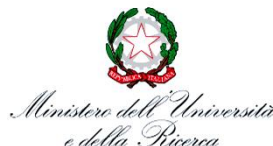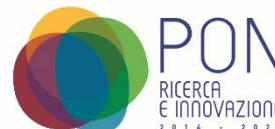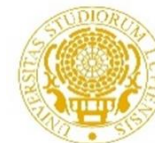

UNIVERSITÀ  
DEL SALENTO

## **Abstract:**

Human activities, especially the globalization of trade or tourism mass, had lead to he spreading of phytopathological adversities, all over the world.

These pathogens can have serious economic/environmental repercussions, due to the absence of therapeutic techniques and the need of rapid, in-field and low-cost detection methods.

Here we present a Lab-on-chip (LOC) platform, with electrochemical transduction method, recognizing serial dilutions of Grapevine leafroll-associated virus 3 (GLRaV-3).

LOC require small sample volumes, allowing a rapid detection of the target.

**Keywords:** Plant pathogens, environmental monitoring, sensors, lab-on-chip

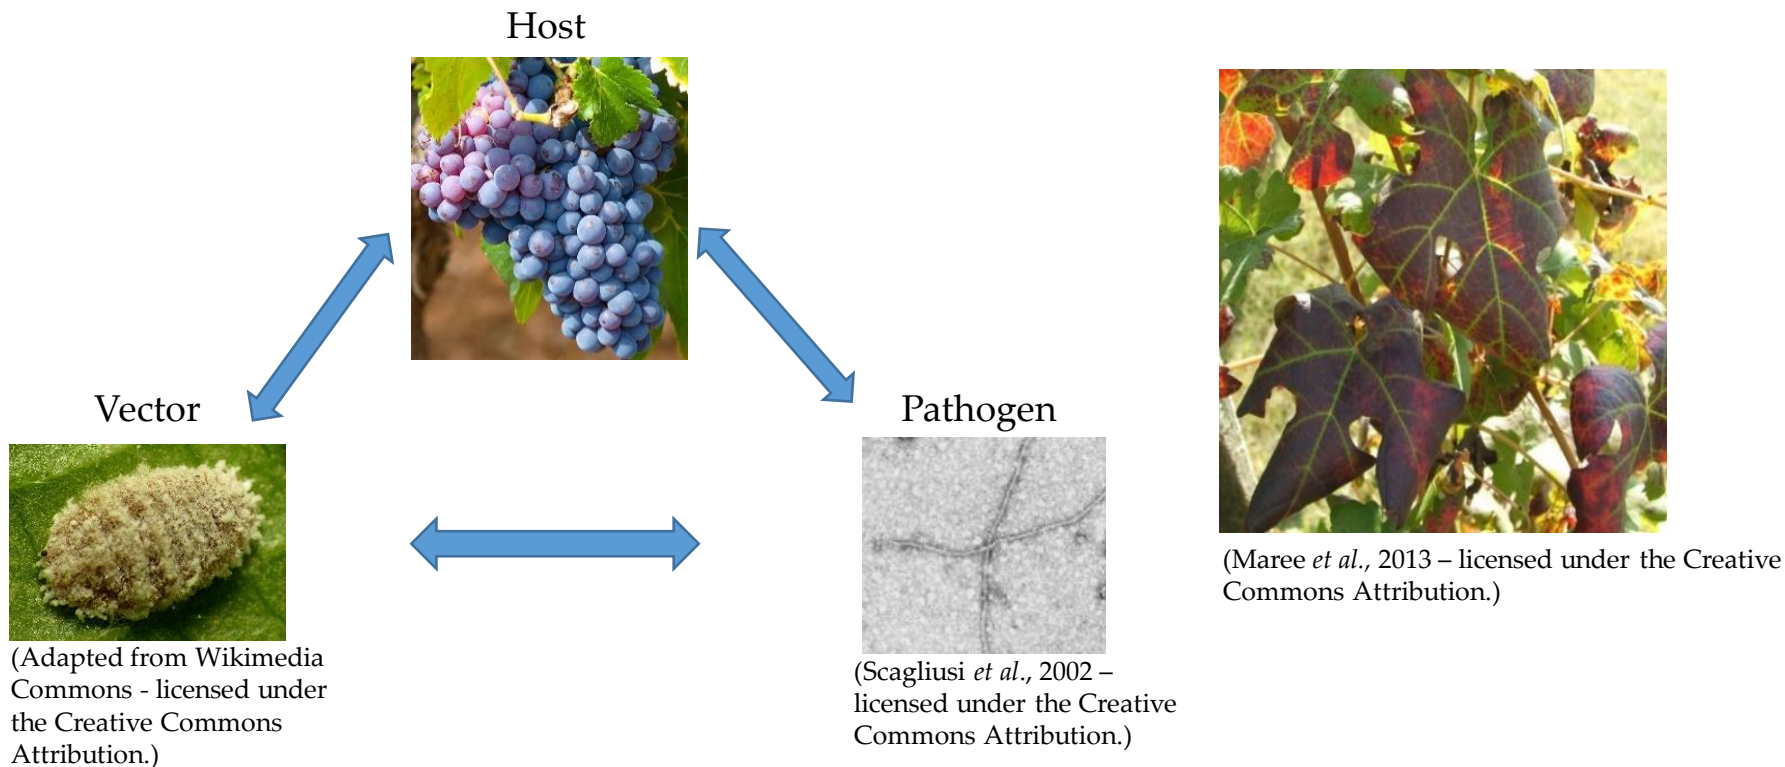

## Significant yield losses!

An estimated economic impact from \$ 25,000 to \$ 40,000 per hectare, in the absence of any control measure (Atallah *et al.*, 2012)

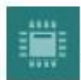

sensors

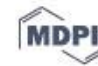

Review

### Advances in Plant Disease Detection and Monitoring: From Traditional Assays to In-Field Diagnostics

Ilaria Buja <sup>1,2</sup>, Erika Sabella <sup>3</sup>, Anna Grazia Monteduro <sup>1,2</sup>, Maria Serena Chiriaco <sup>2</sup>, Luigi De Bellis <sup>3</sup>,  
Andrea Luvisi <sup>3,\*</sup> and Giuseppe Maruccio <sup>1,2</sup>

ICMA  
2021

# ELISA TEST

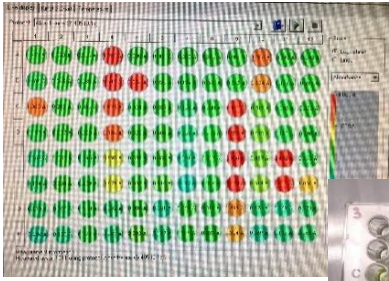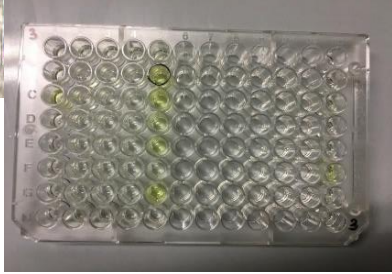

# LOC

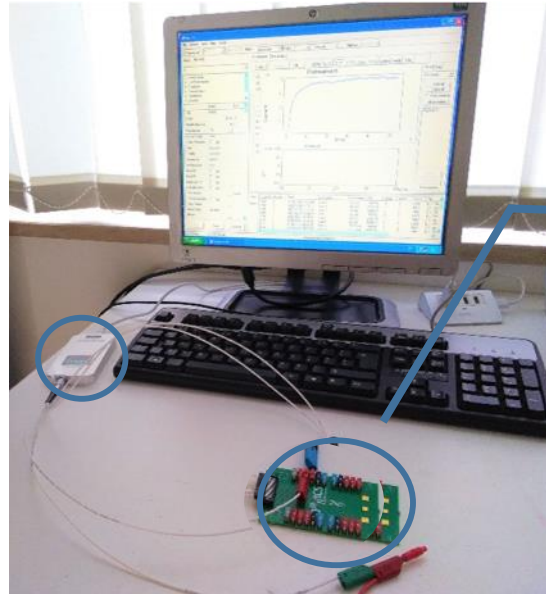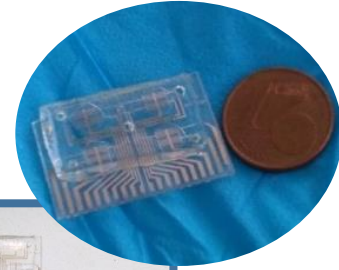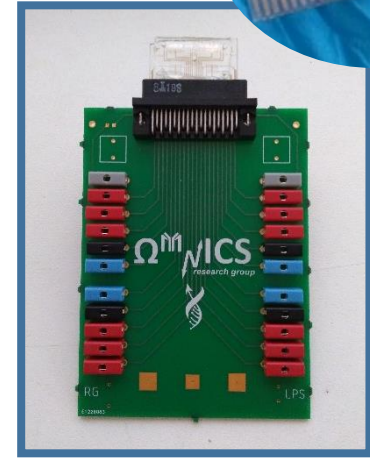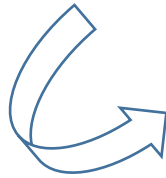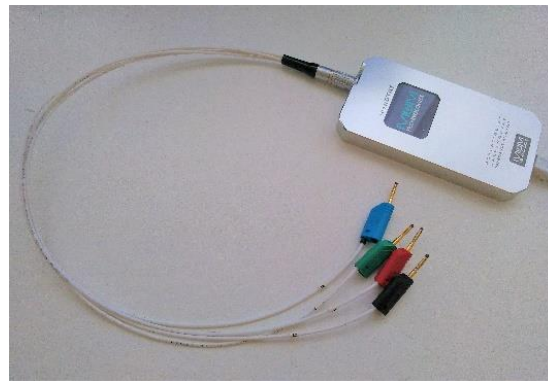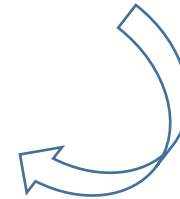



# Results and discussion

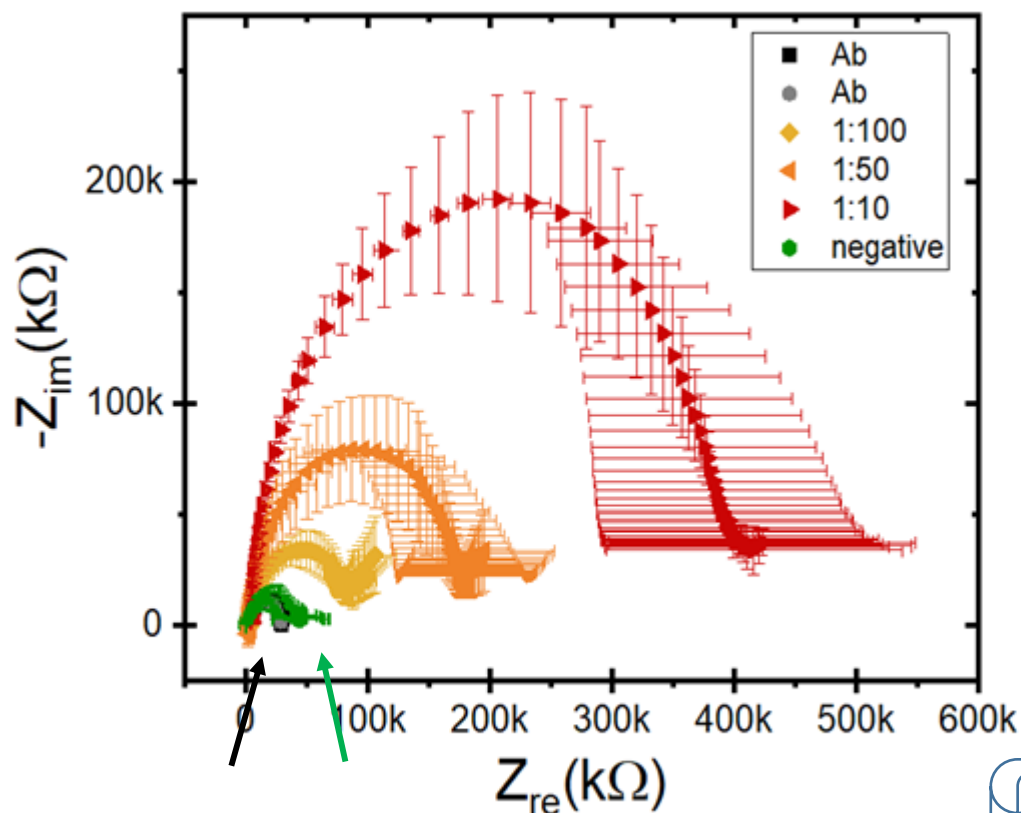

The electron transfer resistance is about 40 k $\Omega$  after immobilization of the GLRaV-3 antibody and healthy sample.

## ELISA test

| Sample dilution | LOC | ELISA |
|-----------------|-----|-------|
| 1:3             | +   | +     |
| 1:5             | +   | +     |
| 1:10            | +   | -     |
| 1:20            | +   | -     |
| 1:50            | +   | -     |
| 1:100           | +   | -     |
| 1:1000          | -   | -     |

### CURRENT DETECTION METHODS

Blouin, A. *et al.*, 2017;  
Rowhani, A. *et al.*, 2017;  
Bendel *et al.*, 2020.

# Conclusions

- **LOC devices shows higher sensitivity compared to ELISA test.**
- **This device can be competitive with conventional diagnostic methods for costs and portability, making the difference in real time detection of the pathogens.**
- **Due to its ease of use, sensibility and specificity, is possible to extend its application, for the detection of other viruses.**

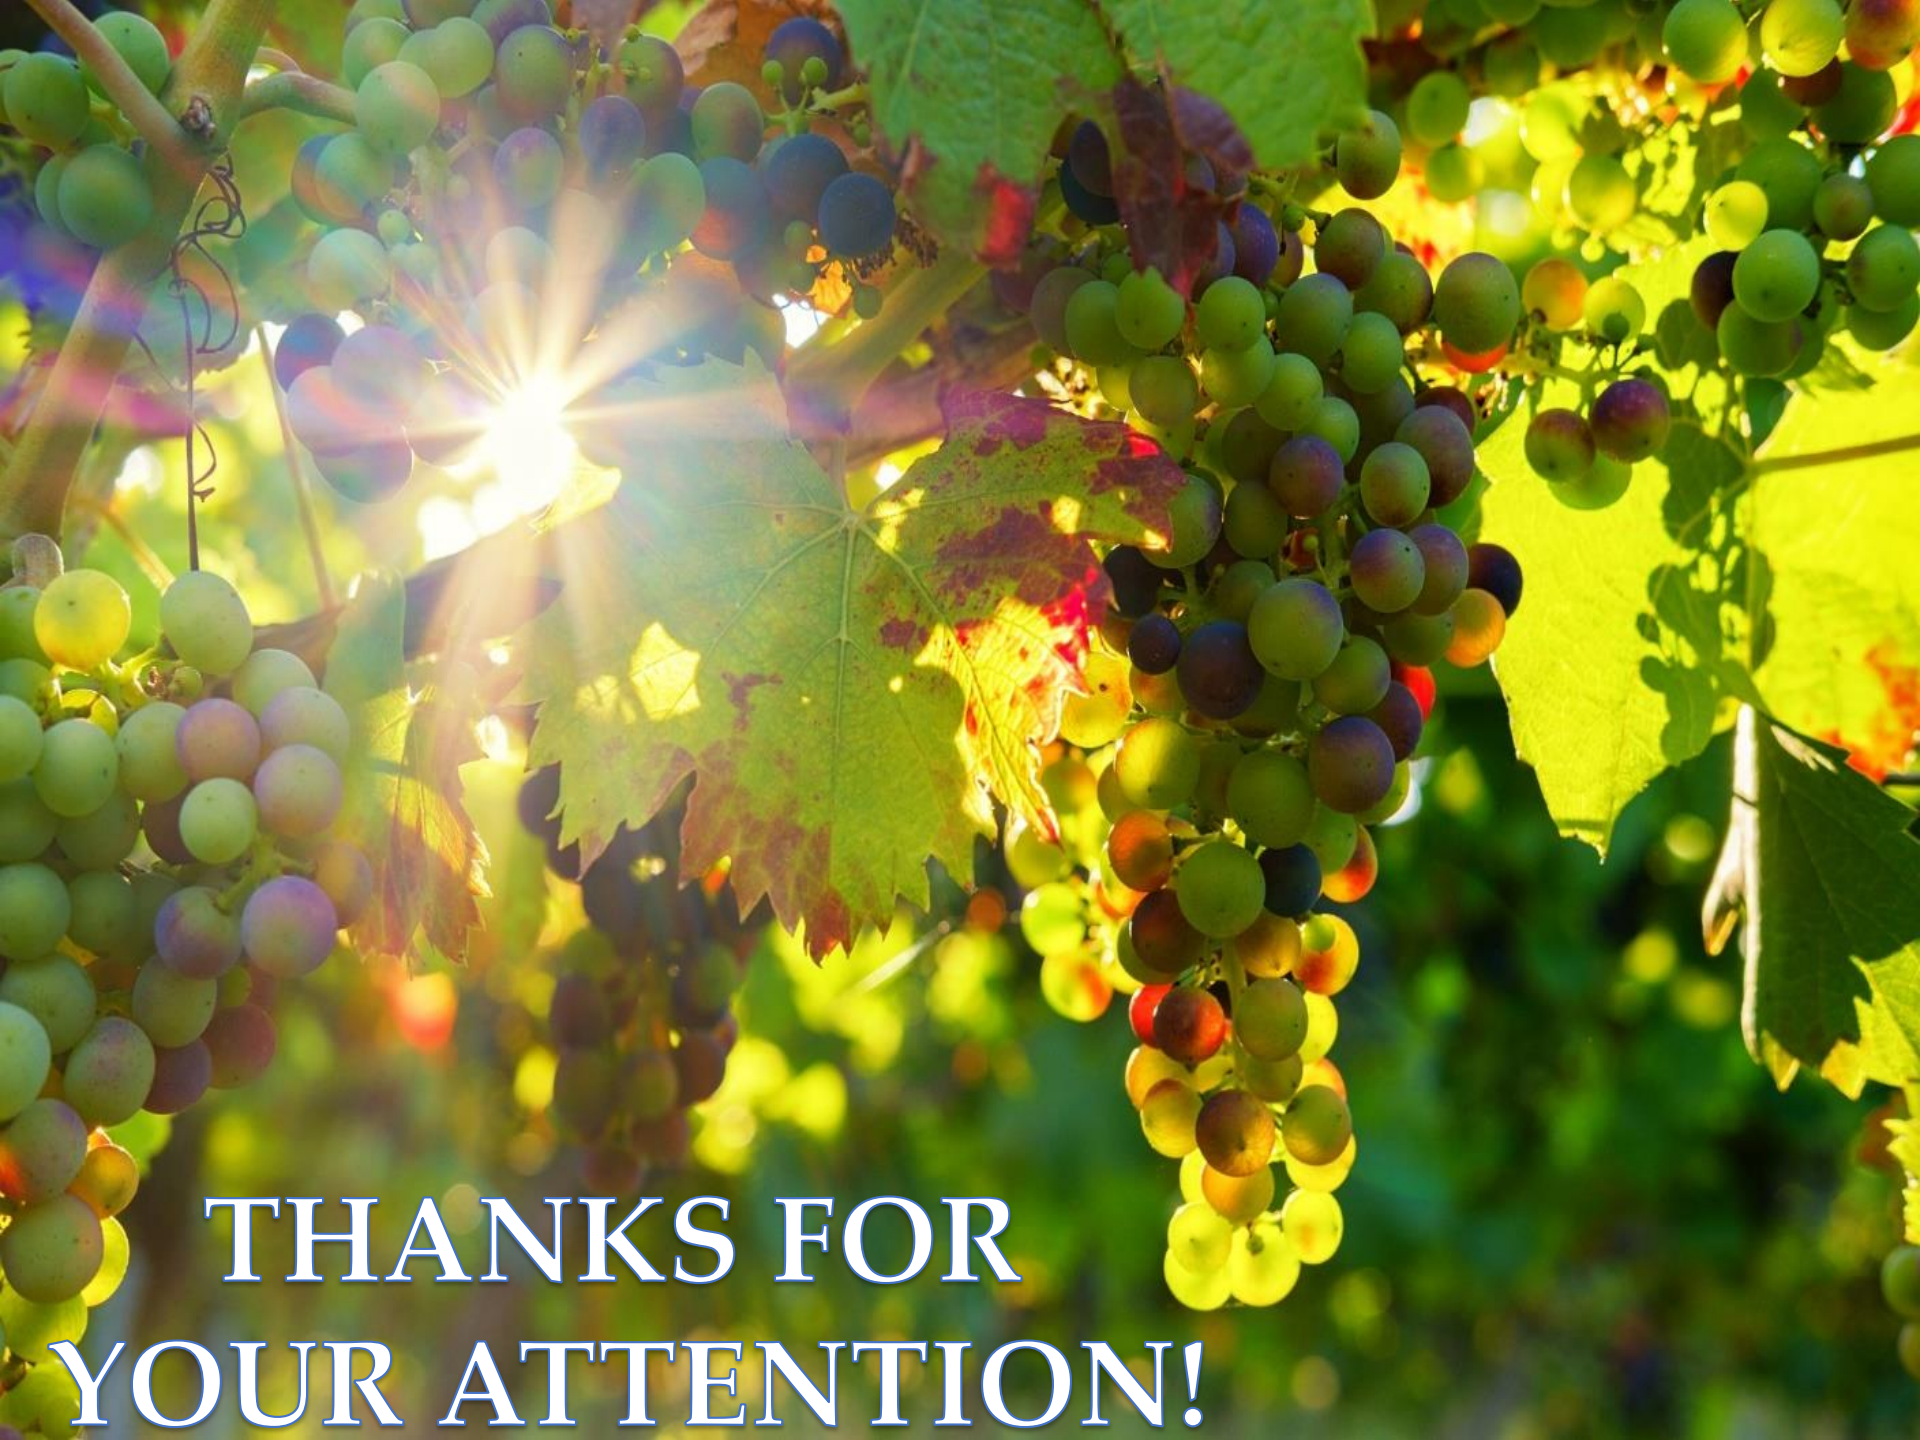

THANKS FOR  
YOUR ATTENTION!

# Supplementary Materials

## Links:

- Maree, H. J.; Almeida, R. P. P.; Bester, R.; Chooi, K. M.; Cohen, D.; Dolja, V. V.; Fuchs, M. F.; Golino, D. A.; Jooste, A. E. C.; Martelli, G. P.; Naidu, R. A.; Rowhani, A.; Saldarelli, P.; Burger, J. Grapevine Leafroll-Associated Virus 3. *Front. Microbiol.* **2013**, *4*. <https://doi.org/10.3389/fmicb.2013.00082>.
- Scagliusi, S. M. M.; Vega, J.; Kuniyuki, H. Cytopathology of Callus Cells Infected with Grapevine Leafroll-Associated Virus 3. *Fitopatologia Brasileira* **2002**, *27* (4), 384–388. <https://doi.org/10.1590/S0100-41582002000400008>.
- Atallah, S. S.; Gómez, M. I.; Fuchs, M. F.; Martinson, T. E. Economic Impact of Grapevine Leafroll Disease on *Vitis Vinifera* Cv. Cabernet Franc in Finger Lakes Vineyards of New York. *Am J Enol Vitic.* **2012**, *63* (1), 73–79. <https://doi.org/10.5344/ajev.2011.11055>.
- Buja, I.; Sabella, E.; Monteduro, A. G.; Chiriaco, M. S.; De Bellis, L.; Luvisi, A.; Maruccio, G. Advances in Plant Disease Detection and Monitoring: From Traditional Assays to In-Field Diagnostics. *Sensors* **2021**, *21* (6), 2129. <https://doi.org/10.3390/s21062129>.



# Supplementary Materials

## Links:

- Blouin, A. G.; Chooi, K. M.; Cohen, D.; MacDiarmid, R. M. Serological Methods for the Detection of Major Grapevine Viruses. In *Grapevine Viruses: Molecular Biology, Diagnostics and Management*; Meng, B., Martelli, G. P., Golino, D. A., Fuchs, M., Eds.; Springer International Publishing: Cham, 2017; pp 409–429. [https://doi.org/10.1007/978-3-319-57706-7\\_21](https://doi.org/10.1007/978-3-319-57706-7_21).
- Rowhani, A.; Osman, F.; Daubert, S. D.; Al Rwahnih, M.; Saldarelli, P. Polymerase Chain Reaction Methods for the Detection of Grapevine Viruses and Viroids. In *Grapevine Viruses: Molecular Biology, Diagnostics and Management*; Meng, B., Martelli, G. P., Golino, D. A., Fuchs, M., Eds.; Springer International Publishing: Cham, 2017; pp 431–450. [https://doi.org/10.1007/978-3-319-57706-7\\_22](https://doi.org/10.1007/978-3-319-57706-7_22).
- Bendel, N.; Kicherer, A.; Backhaus, A.; Köckerling, J.; Maixner, M.; Bleser, E.; Klück, H.-C.; Seiffert, U.; Voegelé, R. T.; Töpfer, R. Detection of Grapevine Leafroll-Associated Virus 1 and 3 in White and Red Grapevine Cultivars Using Hyperspectral Imaging. *Remote Sensing* **2020**, *12* (10), 1693. <https://doi.org/10.3390/rs12101693>.

# Acknowledgments

This work was supported by PON FSE – FESR 2014–2020 (CCI 2014IT16M2OP005) – Axis I “Investments in Human Capital” Action I.1 “Innovative PhDs with industrial characterization” – project DOT1712250 code 1 and by the Italian National FISR-CIPE Project “Inno-Sense”: Development of an innovative sensing platform for on-field analysis and monitoring (delibera CIPE n.78 del 07/08/2017).
